# Supplementary material
Source: Springer Nature journal article supplement (https://www.springermedizin.de/resource/supplementary/12885_2011_2969_MOESM4_ESM.pdf/9462412)

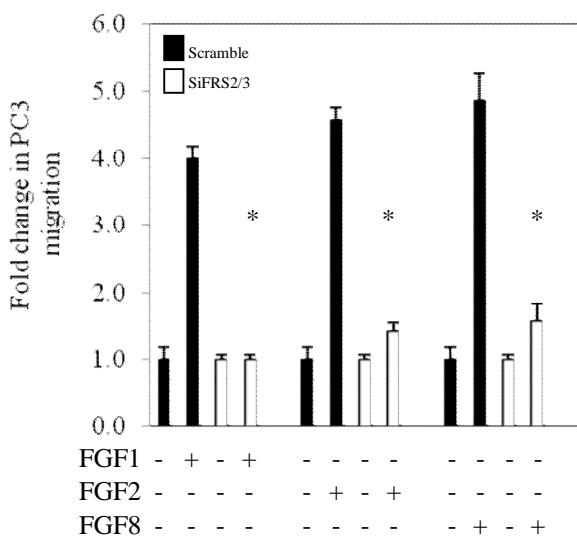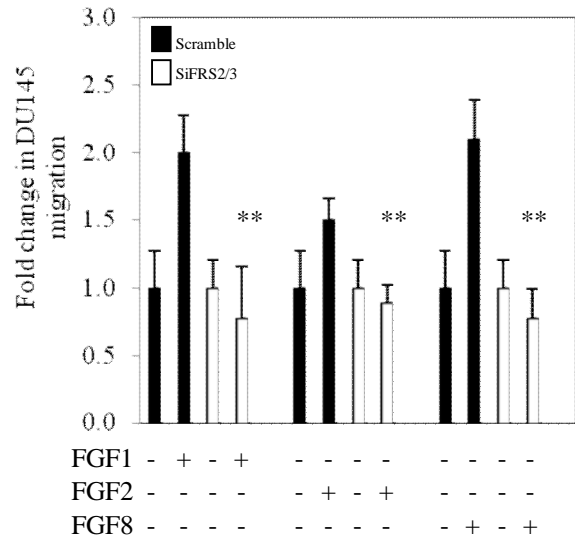

**A**

**B**

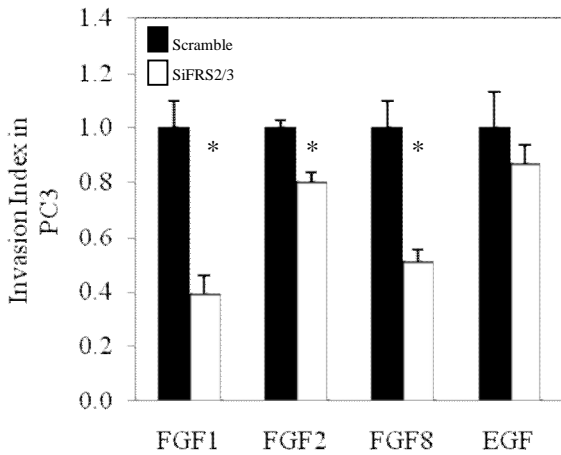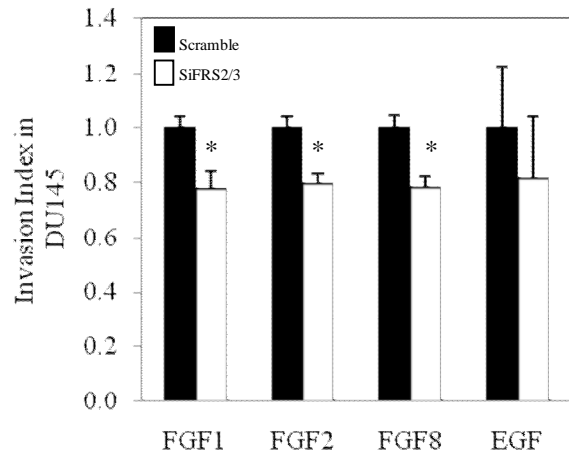

**C**

**D**

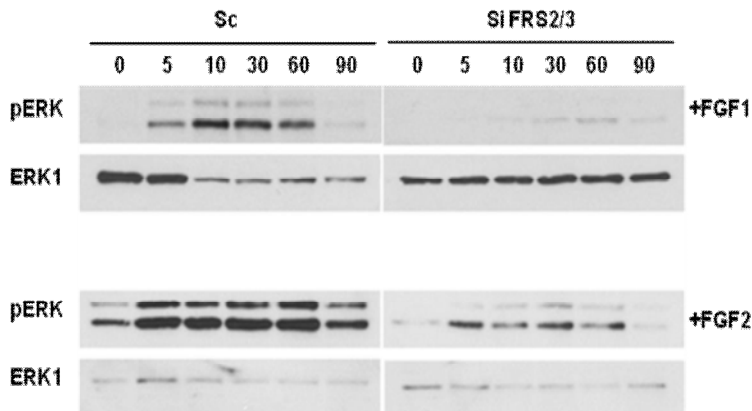

**E**

Supplement: MOESM4 [file 9462412]
